# Supplementary material
Source: Elsevier journal article supplement (https://www.sciencedirect.com/science/article/pii/S0048712020300360)
Supplement: mmc2 [file S0048712020300360:mmc2.pdf]

*Descripción de las técnicas*

| Técnica     | Descripción                                                                                                                                                                                                                      | Efecto fisiológico / Indicación                                                                                                                                                                                                                                                                                                                                                               |
|-------------|----------------------------------------------------------------------------------------------------------------------------------------------------------------------------------------------------------------------------------|-----------------------------------------------------------------------------------------------------------------------------------------------------------------------------------------------------------------------------------------------------------------------------------------------------------------------------------------------------------------------------------------------|
| <b>IMMT</b> | Combinación de estiramientos y compresión del músculo                                                                                                                                                                            | Activa la regulación nerviosa y endocrina del músculo mediante un mecanismo desconocido <sup>(7)</sup>                                                                                                                                                                                                                                                                                        |
| <b>JM</b>   | Movilización articular cervical en los últimos grados de movimiento <sup>(8)</sup>                                                                                                                                               | Se utiliza para tratar el déficit de movilidad o la limitación progresiva, identificar el segmento cervical afectado e irritar los receptores sensoriales del dolor que ayudan al músculo a hacer fuerza en la dirección correcta <sup>(8)</sup>                                                                                                                                              |
| <b>ART</b>  | Terapia manual para tratar tejidos blandos como tendones, nervios o fascias, <sup>(8)</sup>                                                                                                                                      | Indicado para tratar adherencias de tejido cicatricial y los tejidos que causan dolor, espasmo, debilidad, hormigueo u otros síntomas <sup>(8)</sup>                                                                                                                                                                                                                                          |
| <b>MET</b>  | Isométrico del músculo afectado para conseguir una relajación post-isométrica mediante la inhibición autógena, y otro isométrico en el músculo antagonista para producir inhibición recíproca al músculo deseado. <sup>(3)</sup> | Inhibición autógena mediante los órganos tendinosos de Golgi. <sup>(3)</sup>                                                                                                                                                                                                                                                                                                                  |
| <b>CI</b>   | Presión directa mantenida sobre el PGM <sup>(3)</sup>                                                                                                                                                                            | Disminuye el flujo sanguíneo y libera la tensión del músculo <sup>(3)</sup>                                                                                                                                                                                                                                                                                                                   |
| <b>SCS</b>  | Presión sobre el músculo en acortamiento <sup>(3)</sup>                                                                                                                                                                          | Reduce la tensión muscular y favorece la circulación local <sup>(3)</sup>                                                                                                                                                                                                                                                                                                                     |
| <b>INIT</b> | Combinación de MET+CI+SCS <sup>(3)</sup>                                                                                                                                                                                         | Suma de los efectos de MET+CI+SCS                                                                                                                                                                                                                                                                                                                                                             |
| <b>US</b>   | Se aplica el US en la zona de los PGM. <sup>(15)</sup>                                                                                                                                                                           | Cauda efectos térmicos y biofísicos. Proporciona un calentamiento profundo que causa dilatación de los vasos sanguíneos, aumento del flujo sanguíneo y disminución de sustancias álgicas <sup>(9,15,17,24)</sup>                                                                                                                                                                              |
| <b>FF</b>   | Aplicación de un principio activo analgésico mediante US para incrementar la capacidad de absorción <sup>(17)</sup>                                                                                                              | Activa los canales de sodio de los nociceptores de los PGM <sup>(17)</sup>                                                                                                                                                                                                                                                                                                                    |
| <b>INS</b>  | Combina aspectos de acupuntura y TENS y permite una alta frecuencia y alta intensidad sobre el tejido sin inducir contracciones musculares <sup>(12)</sup>                                                                       | Se desconoce el mecanismo exacto. Se cree que disminuye el dolor porque la acupuntura reequilibra el cuerpo a nivel energético y el TENS ayuda en la liberación de opioides endógenos, modula de forma bidireccional la comunicación entre piel, sistema nervioso y sistema inmune y estimula las fibras C y Aδ reduciendo la vía del dolor con el mecanismo de gate-control. <sup>(12)</sup> |
| <b>PS</b>   | Se inserta una aguja de AC en un PGM                                                                                                                                                                                             | Reduce el acortamiento muscular y el riego sanguíneo. Potencialmente puede ayudar a reducir la entrada del nociceptor en la fase aguda de la lesión y por tanto ayudar a prevenir el desarrollo de la sensibilización central <sup>(5,13,14,30)</sup>                                                                                                                                         |
| <b>AC</b>   | Punción en los puntos energéticos siguiendo los meridianos de acupuntura y manteniéndolas durante 20min <sup>(20)</sup> o en el PGM directamente <sup>(31)</sup>                                                                 | Produce un efecto que se transmite en el interior del cuerpo a través de los meridianos o canales por los que circula la energía y regula las funciones del cuerpo. <sup>(39)</sup>                                                                                                                                                                                                           |
| <b>MSN</b>  | Punción con una aguja plana como un pequeño bisturí en el punto gatillo siguiendo la dirección de las fibras. <sup>(19)</sup>                                                                                                    | Permite cortar y separar bandas tensas del sistema miofascial, relajar los vasos sanguíneos comprimidos y los nervios atrapados, además de estimular los paquetes vasculo-nerviosos, restaurar la mecánica dinámica del equilibrio e incrementar la circulación local. <sup>(19)</sup>                                                                                                        |
| <b>LEI</b>  | Aplicación de energía del espectro electromagnético al organismo <sup>(29)</sup>                                                                                                                                                 | Aumenta el flujo sanguíneo, la permeabilidad vascular y el metabolismo celular <sup>(29)</sup>                                                                                                                                                                                                                                                                                                |

## Datos de los artículos seleccionados

| Artículo                        | Muestra | Diseño del estudio y validez | Grupos y Técnicas de intervención                                                                   | Tiempo de tratamiento                | Parámetros de evaluación                                                                        | Períodos de evaluación                                                     | Resultados                                                                                                                                                                                 |
|---------------------------------|---------|------------------------------|-----------------------------------------------------------------------------------------------------|--------------------------------------|-------------------------------------------------------------------------------------------------|----------------------------------------------------------------------------|--------------------------------------------------------------------------------------------------------------------------------------------------------------------------------------------|
| <b>Nagrale AV et al</b>         | 60      | ECA<br>JADAD 4               | - Técnicas de energía muscular (MET)<br>- Integrated neuromuscular inhibition technique (INIT)      | 3 veces por semana durante 4 semanas | - Escala visual analógica (EVA)<br>- Neck disability Index (NDI)<br>- Rango de movimiento (ROM) | Antes del tratamiento y a la 2ª i 4ª semana des del inicio del tratamiento | Los dos grupos mejoran en las tres medidas dos grupos a las 2 y 4 semanas pero el grupo INIT tiene mejores resultados a post-tratamiento                                                   |
| <b>Kim JH. et al</b>            | 24      | ECA<br>JADAD 1               | - Técnicas de liberación (ART)<br>- Movilización articular (JM)<br>- Grupo control sin intervención | 2 veces por semana durante 3 semanas | - EVA<br>- Umbral de dolor por presión (UDP)<br>- ROM                                           | Antes y después del tratamiento                                            | Los grupos tratados mejoran en los tres parámetros y el grupo control no. No hay mejoras significativas entre los grupos de tratamiento                                                    |
| <b>Kannan P. et al.</b>         | 45      | ECA<br>JADAD 3               | - US<br>- Láser<br>- Compresión isquémica (CI)                                                      | 5 sesiones consecutivas              | - EVA<br>- ROM en inclinación                                                                   | Antes del tratamiento y después de cinco sesiones                          | Los tres grupos presentan mejoras significativas en la percepción del dolor y el ROM. En todos los parámetros el láser obtiene mejores resultados                                          |
| <b>Schabrun SM et al</b>        | 23      | ECA<br>JADAD 5               | - Neuroestimulación interactiva (INS)<br>- Neuroestimulación interactiva simulada                   | 1 sesión de 10'                      | - EVA<br>- NDI<br>- Patient specific funcional scale (PSFS)                                     | Antes del tratamiento, justo después i 5 días más tarde                    | Los dos grupos mejoran en los tres parámetros. Sólo se considera relevante la diferencia en la funcionalidad, a favor del grupo que recibe tratamiento real.                               |
| <b>Kim AS et al</b>             | 60      | ECA<br>JADAD 1               | - Punción (PS)<br>- Punción + CI 30''<br>- Punción + CI 60''                                        | 1 sesión                             | - EVA<br>- ROM<br>- UDP<br>- NDI                                                                | Antes del tratamiento, justo después i una semana más tarde                | EVA, LDP y NDI mejoran en los tres grupos. A largo plazo los grupos con CI mejoran más que el de PS sola pero sin diferencias significativas. El ROM mejora en todos los grupos por igual. |
| <b>Liu L. et al</b>             |         | Metanálisis                  | - PS vs control<br>- PS vs punción húmeda<br>- PS vs otros ttms                                     | .                                    | -EVA                                                                                            |                                                                            | El grupo de PS comparado con ninguna intervención presenta cambios significativos a corto y medio plazo, pero los otros grupos no consiguen diferencias relevantes                         |
| <b>Pecos-Martín D. et al</b>    | 72      | ECA<br>JADAD 5               | - PS<br>- PS en puntos no PGM                                                                       | 1 sesión de tratamiento              | - EVA<br>- Neck Pain Questionnaire (NPQ)<br>- UDP                                               | Después del tratamiento, al cabo de una semana y pasado 1 mes              | El grupo de PS mejora el dolor y el NPQ después del tratamiento y al cabo de un mes. El UDP mejora en los dos grupos pero el de PS obtiene mejores resultados a largo plazo                |
| <b>Mejuto-Vázquez MJ. et al</b> | 17      | ECA<br>JADAD 4               | - PS<br>- Grupo control sin intervención                                                            | 1 sesión de tratamiento              | -Dolor (MDC y lindar de dolor per presión)<br>-ROM                                              | 10 min después del ttm y una semana más tarde                              | Con una única sesión de PS el grupo de ttm obtiene mejoras significativas respecto el grupo control en la reducción del EVA, aumento de UDP y el ROM                                       |

|                               |    |                |                                                                                                                   |                                                                                    |                                                                             |                                                                     |                                                                                                                                                                                                                                                                                   |
|-------------------------------|----|----------------|-------------------------------------------------------------------------------------------------------------------|------------------------------------------------------------------------------------|-----------------------------------------------------------------------------|---------------------------------------------------------------------|-----------------------------------------------------------------------------------------------------------------------------------------------------------------------------------------------------------------------------------------------------------------------------------|
| <b>Ma C. et al.</b>           | 49 | ECA<br>JADAD 3 | - Miniscalpel-needle (MNS) + estiramientos<br>- Acupuntura (AC) + estiramientos<br>- Grupo control: estiramientos | 1 o 2 sesiones de estiramientos 3 veces al día durante 3 meses en todos los grupos | - EVA<br>- UDP<br>- ROM                                                     | Antes del tratamiento, a las dos semanas y hasta tres meses después | La MNS y la AC mejoran en los tres parámetros en todas las evaluaciones, mientras el grupo control no mejora en ningún de los parámetros al cabo de 2 semanas pero sí que mejora significativamente al cabo de 3 meses en EVA, UPD y ROM                                          |
| <b>Sun MY et al.</b>          | 35 | ECA<br>JADAD 4 | - AC<br>- AC simulada                                                                                             | 2 veces por semana durante 3 semanas                                               | - EVA<br>- ROM<br>- SF-36                                                   | Antes del tratamiento, justo después y 4 y 12 semanas más tarde     | La calidad de vida mejora en el grupo de tratamiento, el ROM en los dos grupos en las tres evaluaciones y la EVA es mejor antes del tratamiento que después en los dos grupos. Aún y todo, no hay diferencias significativas entre los dos grupos en el ROM y EVA                 |
| <b>Yoon SH et a.</b>          | 84 | ECA<br>JADAD 5 | - PS aguja 0'21mm<br>- PS aguja 0'23mm<br>- PS aguja 0'25mm                                                       | 1 sesión                                                                           | - EVA<br>- NDI<br>- SF-36                                                   | Antes del tratamiento, al 4o, 7o y 14o día                          | La EVA mejora en los tres grupos pero sin diferencias entre grupos, igual que el NDI, el cual mejora en la evaluación al 7º y 14º día. El SF-36 mejora en el 7º y 14º día en las agujas de 0'21mm y 0'23mm pero en la de 0'25 sólo mejora el día 7                                |
| <b>Segura Ortí E. et al</b>   | 34 | ECA<br>JADAD 5 | - PS<br>- Strain-countstrain (SCS)<br>- Simulació SCS                                                             | 3 sesiones de PS o 6 sesiones de SCS o simulación                                  | - EVA<br>- NDI                                                              | Antes del tratamiento y a las 3 semanas                             | La EVA disminuye en los tres grupos sin diferencias significativas entre grupos y evaluaciones                                                                                                                                                                                    |
| <b>Cagnie B. et al</b>        |    | Revisión       | - CI<br>- PS<br>-Otros tratamientos (MET, estiramientos, masaje transversal profundo...)                          | -                                                                                  | - EVA<br>-UDP<br>-ROM<br>-Funcionalidad<br>-Nottingham Health Profile (NHP) | -                                                                   | Se consiguen mejoras en la EVA y UDP en ambos grupos. En el ROM la CI mejora pero es más efectiva combinada con otras técnicas cómo la MET y resulta favorable respecto la PS. En la calidad de vida la PS obtiene los mismos resultados que las inyecciones de lidocaína o AINES |
| <b>Ziaefar M. et al</b>       | 33 | ECA<br>JADAD 2 | - PS<br>- Grupo control: CI                                                                                       | 3 sesiones de tratamiento en una semana                                            | - EVA<br>- UDP<br>- Discapacidad del brazo, mano y hombro (DASH)            | Antes y una semana después del tratamiento                          | Todos los parámetros mejoran significativamente respecto al inicio de tratamiento en ambos grupos. La única diferencia relevante es en la puntuación de la EVA, que es mejor en el grupo de PS                                                                                    |
| <b>Llamas-Ramos R. et al</b>  | 94 | ECA<br>JADAD 5 | -PS<br>-Terapia manual (TM)                                                                                       | 2 sesiones                                                                         | - EVA<br>-UDP<br>- ROM<br>- NPQ                                             | Después del tratamiento, una y dos semanas más tarde                | En la EVA no se consiguen cambios significativos entre los grupos, el UDP mejora significativamente en el grupo de PS, el ROM mejora en los dos grupos por igual y el NPQ ligeramente favorable a la PS                                                                           |
| <b>Cerezo-Téllez E. et al</b> | 44 | ECA<br>JADAD 4 | - PS + estiramientos<br>- Estiramientos                                                                           | 5 sesiones distribuidas en tres semanas (2 les dos 1as y a la 3ra 1).              | - EVA<br>- UDP<br>- ROM                                                     | Antes, después del tratamiento y 15 días más tarde                  | La EVA y el UDP mejoran en los dos grupos aunque en el de PS más. En el ROM el grupo de PS mejora en todos los movimientos mientras que en el de estiramientos sólo mejora la rotación                                                                                            |
| <b>Unalan H et al.</b>        | 49 | ECA<br>JADAD 4 | - High-power threshold ultrasound (HPPT US)<br>- Inyección de lidocaína                                           | 1 sesión para todos y dos para el grupo de US que lo necesiten                     | - EVA<br>-ROM                                                               | Antes y hasta cuatro semanas después del tratamiento                | Hay mejoras en el dolor y el ROM en los dos grupos sin diferencias significativas entre ellos. La media de sesiones en el grupo de HPPT es menor que el de inyecciones                                                                                                            |
| <b>Rohe BG et al.</b>         | 38 | ECA            | - Integrative muscular movement technique (IMMT)                                                                  | 30 min durante 4 semanas                                                           | - EVA<br>- ROM                                                              | Antes y después de cada sesión de                                   | La EVA presenta diferencias significativas en la reducción del dolor a favor del grupo IMMT. EN el                                                                                                                                                                                |

|                          |    |                      |                                                                                                                                                                 |                                                                                                                 |                                                           |                                                                                  |                                                                                                                                                                                                                                                       |
|--------------------------|----|----------------------|-----------------------------------------------------------------------------------------------------------------------------------------------------------------|-----------------------------------------------------------------------------------------------------------------|-----------------------------------------------------------|----------------------------------------------------------------------------------|-------------------------------------------------------------------------------------------------------------------------------------------------------------------------------------------------------------------------------------------------------|
|                          |    | JADAD 1              | - Masaje sueco                                                                                                                                                  |                                                                                                                 |                                                           | tratamiento                                                                      | ROM hay un aumento en las inclinaciones en el grupo IMMT y disminución del movimiento en el grupo de masaje sueco                                                                                                                                     |
| <b>Kietrys DM. et al</b> |    | Revisión-Metanálisis | - PS vs placebo efecto inmediato<br>- PS vs placebo a las 4 semanas<br>- PS + otra intervención de efecto inmediato<br>- PS + otra intervención a las 4 semanas |                                                                                                                 | - EVA                                                     | Antes del tratamiento, justo después y al cabo de 4 semanas                      | Hay mejoras significativas en la reducción inmediata del dolor con PS en comparación al grupo placebo. El efecto de la lidocaína parece que podría ser superior que la PS en el efecto inmediato y a las 4 semanas                                    |
| <b>Itoh K. et al</b>     | 31 | ECA<br>JADAD 5       | - AC<br>- AC en los PGM<br>- Simulación de acupuntura                                                                                                           | 2 sesiones                                                                                                      | -EVA<br>- NDI                                             | Antes y después del tratamiento a las semanas 1,3,6,9 y 12                       | Sólo hay mejoras significativas en el grupo de AC en los PGM a la 3ª semana y al finalizar el tratamiento en los resultados de EVA y NDI. En el resto de grupos los resultados no son suficientemente relevantes                                      |
| <b>Tekin L. et al</b>    | 39 | ECA<br>JADAD 4       | - PS<br>- Simulación de PS                                                                                                                                      | 6 sesiones en 4 semanas                                                                                         | - EVA<br>- SF-36                                          | Antes del tratamiento, justo después de la primera sesión y al finalizarlo       | La PS realizada en los PGM es más eficaz que el tratamiento simulado de PS en el dolor y en la calidad de vida                                                                                                                                        |
| <b>Wilke J. et al</b>    | 19 | ECA<br>JADAD 4       | - AC<br>- AC+ estiramientos<br>- AC con láser simulado                                                                                                          | 1 semana                                                                                                        | -EVA<br>- ROM                                             | Antes del tratamiento y a los 5,15,30 minutos después                            | Se obtienen resultados significativos en AC y estiramientos para reducir el dolor y aumentar el ROM, y a corto plazo en comparación con la AC sola o combinada con la simulación de láser                                                             |
| <b>Ilter L. et al</b>    | 60 | ECA<br>JADAD 5       | - US continuo<br>- US pulsátil<br>- Control: US apagado, placebo                                                                                                | 5 veces por semana durante 2 semanas (10 sesiones de 5')                                                        | - EVA<br>- Neck Pain and Disability Scale (NPDS)<br>- NHP | Antes del tratamiento, justo después y al cabo de 6-12 semanas después de acabar | El dolor en reposo mejora significativamente en el grupo tratado con US continuo. No hay diferencia significativa entre US continuo y el pulsátil respecto la simulación de la técnica en los parámetros de dolor, funcionalidad y calidad de vida    |
| <b>Dundar U. et al</b>   | 76 | ECA<br>JADAD 5       | - Láser (LEI) + ejercicios<br>- Placebo + ejercicios                                                                                                            | 1 vez al día durante 15 días en un período de 3 semanas                                                         | - EVA<br>- ROM<br>- NDI<br>- SF-36                        | Antes del tratamiento y a las 4 y 12 semanas                                     | Todos los grupos mejoran significativamente en los 4 parámetros a la 4ª y 12ª semana. EL grupo LEI muestra mejor puntuación en EVA, NDI y SF-36 en comparación con el grupo de simulación                                                             |
| <b>Koca I. et al</b>     | 61 | ECA<br>JADAD 4       | - US dosis media<br>- HPPT US<br>-US dosis baja                                                                                                                 | - G1: 5 días en 2 semanas<br>- G2: 4 sesiones en intervalos de 3 días<br>- G3: 10 sesiones, 5 días en 2 semanas | - EVA<br>- LDP<br>-ROM<br>-NPDS                           | Antes del tratamiento y 3 semanas después                                        | Hay mejora significativa después del tratamiento en la EVA en los tres grupos, y sólo en US a media dosis y HPPT el NPDS mejora. El aumento de UDP es significativo en HPPT. El HPPT se podría considerar más fiable y efectivo que los otros métodos |
| <b>Ustun N. et al.</b>   | 50 | ECA<br>JADAD 4       | - Fonoforesis (FF)<br>- US estándar                                                                                                                             | 10 minutos de sesión en 15 sesiones.                                                                            | - EVA<br>-ROM<br>-NPDS                                    | Antes del tratamiento y justo después de las 15 sesiones                         | La FF es más eficaz que la terapia de US convencional, en términos de dolor y discapacidad asociada a la funcionalidad cervical. Parece una buena opción complementaria para el SDM                                                                   |
